# Supplementary material
Source: publisher figshare collection journal article supplement (https://springernature.figshare.com/ndownloader/files/20089949)
Supplement: Supplementary file 1 [file 20089949]

**SUPPLEMENTARY MATERIALS**

**Table S1**. Distribution and density (no. of individuals ha-1) of vegetation across various sampling stations of the wetland and Kruskal-Wallis test with habitat conditions under different sampling stations as the main effect variable

| **Taxa under different family** | **Station 1**  **(Inlet**  **point 1)** | **Station 2**  **(Middle point 1)** | **Station 3**  **(Inlet**  **point 2)** | **Station 4**  **(Middle point 2)** | **Station 5**  **(Outlet point)** | **Chi-square** |
| --- | --- | --- | --- | --- | --- | --- |
| **Amarathaceae** | | | | | | |
| *Alternanthera paronychioides* A. St.-Hil | - | - | 1251667  ±2823476  (0-7000000) | - | 316667  ±560916  (0-1380000) | 6.650ns |
| *Alternanthera sessilis* (L.) R. Br.ex DC. | 90333  ±117689  (0-267000) | - | 6294000  ±9936127  (0-22500000) | - | 12000  ±29394  (0-72000) | 8.716ns |
| **Total density of Amarathaceae** | **90333** | **-** | **7545667** | **-** | **328667** |
| **Apiaceae** | | | | | | |
| *Centella asiatica* (L.) Urb. | 4334  ±10614  (0-26000) | 2667  ±6532  (0-16000) | 158334  ±269103  (0-650000) | 22500  ±55114  (0-135000) | 5000  ±12247  (0-30000) | 1.431ns |
| **Total density of Apiaceae** | **4334** | **2667** | **158334** | **22500** | **5000** |
| **Compositae** | | | | | | |
| *Centipeda minima* (L.) A. Braun & Asch. | - | - | - | - | 5833  ±14289  (0-35000) | 4.000 ns |
| *Eclipta prostrata* (L.) L. | - | - | 16667  ±40825  (0-100000) | - | 5167  ±12656  (0-31000) | 3.109 ns |
| **Total density of Compositae** | **-** | **-** | **16667** | **-** | **11000** |
| **Araceae** | | | | | | |
| *Colocasia esculenta* (L.) Schott | 19167  ±30069  (0-65000) | - | - | - | - | 8.726 ns |
| **Total density of Araceae** | **19167** | **-** | **-** | **-** | **-** |
| **Arecaceae** | | | | | | |
| *Calamus tenuis* Roxb. | - | - | - | 7899  ±3427  (0-14000) | - | 28.538** |
| **Total density of Arecaceae** | **-** | **-** | **-** | **7899** | **-** |
| **Ceratophyllaceae** | | | | | | |
| *Ceratophyllum demersum* L. | - | 62500  ±153093  (0-375000) | - | - | - | 4.000 ns |
| **Total density of Ceratophyllaceae** | **-** | **62500** | **-** | **-** | **-** |
| **Convolvulaceae** | | | | | | |
| *Ipomoea* *carnea* Jacq. | 52167  ±59017  (18000-171000) | 5948  ±7133  (0-19000) | 835167  ±1670282  (0-4200000) | - | 10438  ±6601  (3665-19000) | 19.392** |
| **Total density of Convolvulaceae** | **52167** | **5948** | **835167** | **-** | **10438** |
| **Cyperaceae** | | | | | | |
| *Cyperus haspan* L. | - | 6000  ±14697  (0-36000) | - | - | - | 4.000 ns |
| *Cyperus javanicus* Houtt. | - | 6667  ±16330  (0-40000) | - | - | - | 4.000 ns |
| *Cyperus compressus* L. | - | - | 500000  ±1224745  (0-3000000) | - | 8500  ±20821  (0-51000) | 3.109 ns |
| *Eleocharis acicularis* (L.) Roem. & Schult. | - | - | - | 2455000  ±4733252  (0-11820000) | - | 8.276 ns |
| *Fimbristylis bisumbellata*(Forssk.) Bubani | - | 521500  ±403749  (101000-1118000) | - | 656667  ±1036314  (0-2350000) | 19167  ±46949  (0-115000) | 18.110** |
| *Fimbristylis littoralis* Gaudich. | 9167  ±22454  (0-55000) | - | - | - | - | 4.000 ns |
| **Total density of Cyperaceae** | **9167** | **534167** | **500000** | **3111667** | **27667** |
| **Euphorbiaceae** | | | | | | |
| *Croton* *bonplandianus*  Baill. | - | - | - | 2500  ±6124  (0-15000) | - | 4.000 ns |
| **Total density of Euphorbiaceae** | **-** | **-** | **-** | **2500** | **-** |
| **Marantaceae** | | | | | | |
| *Schumannianthus dichotomus* (Roxb.) Gagnep. | - | 208104  ±130099  (119851-398849) | - | - | - | 28.538** |
| **Total density of Marantaceae** | **-** | **208104** | **-** | **-** | **-** |
| **Melastomataceae** | | | | | | |
| *Melastoma malabathricum* L. | - | 8879  ±4182  (4889-14198) | - | - | - | 28.538** |
| **Total density of Melastomataceae** | **-** | **8879** | **-** | **-** | **-** |
| **Onagraceae** | | | | | | |
| *Ludwigia* *hyssopifolia* (G.Don) Exell | - | - | 500000  ±1224745  (0-3000000) | - | - | 4.000 ns |
| **Total density of Onagraceae** | **-** | **-** | **500000** | **-** | **-** |
| **Poaceae** | | | | | | |
| *Axonopus fissifolius* (Raddi) Kuhlm. | - | - | - | 112500  ±258800  (0-640000) | - | 8.276 ns |
| *Brachiaria ramosa* (L.) Stapf | 96834  ±192011  (0-480000) | - | 33334  ±81650  (0-200000) | - | - | 5.710 ns |
| *Chrysopogon aciculatus* (Retz.) Trin. | 222667  ±542486  (0-1330000) | - | 52500  ±128598  (0-315000) | 68333  ±118357  (0-205000) | - | 4.257 ns |
| *Chrysopogon zizanioides* (L.) Roberty | 913333  ±725213  (258000-2055000) | 703833  ±416840  (53000-1145000) | 32400833  ±64938028  (360000-  163000000) | 1003833  ±1316324  (82000-2880000) | 619500  ±614432  (8000-1790000) | 4.009 ns |
| *Cynodon dactylon* (L.) Pers. | 621667  ±968719  (0-2030000) | 635333  ±783724  (0-1989000) | 68873333  ±105010055  (0-213000000) | 1322500  ±1088061  (0-3170000) | 1065000  ±960161  (0-2140000) | 4.180 ns |
| *Digitaria ciliaris* (Retz.) Koeler | - | - | - | - | 16667  ±40825  (0-100000) | 4.000 ns |
| *Eleusine indica* (L.) Gaertn. | 70834  ±173506  (0-425000) | - | - | - | - | 4.000 ns |
| *Eragrostis unioloides* (Retz.) Nees ex Steud. | 148834  ±358235  (0-880000) | - | - | - | - | 8.276 ns |
| *Hemarthria compressa*  (L.f.) R.Br. | - | - | 111667  ±192916  (0-470000) | - | - | 8.276 ns |
| *Paspalum notatum* Flüggé | 75834  ±185753  (0-455000) | - | - | - | 28334  ±69402  (0-170000) | 3.109 ns |
| *Paspalum scrobiculatum* L. | - | 36833  ±57133  (0-115000) | - | - | - | 8.276 ns |
| *Pseudoraphis* *spinescens* (R.Br.) Vickery | - | 77333  ±185053  (0-455000) | 150000  ±367423  (0-900000) | - | - | 5.488ns |
| *Saccharum ravennae* (L.) L. | - | 1103506  ±394838  (680291-1592870) | 23693968  ±12165660  (12528661-  41999444) | - | 949919  ±199931  (770965-1200000) | 26.842** |
| *Sacciolepis* *interrupta* (Willd.) Stapf | 3667  ±8981  (0-22000) | - | - | - | - | 4.000ns |
| **Total density of Poaceae** | **2153670** | **2556838** | **125315635** | **2507166** | **2679420** |
| **Polygonaceae** | | | | | | |
| *Persicaria hydropiper* (L.) Delarbre | 82167  ±90896  (0-215000) | - | 5833  ±14289  (0-35000) | - | 2834  ±6940  (0-17000) | 11.959** |
| **Total density of Polygonaceae** | **82167** | **-** | **5833** | **-** | **2834** |
| **Pontederiaceae** | | | | | | |
| *Eichhornia crassipes* (Mart.) Solms | 2167  ±3251  (0-8000) | - | 667  ±1633  (0-4000) | 2333  ±5715  (0-14000) | 7167  ±15677  (0-39000) | 4.185 ns |
| **Total density of Pontederiaceae** | **2167** | **-** | **667** | **2333** | **7167** |
| **Rubiaceae** | | | | | | |
| *Oldenlandia diffusa* (Wild.) Roxb. | - | 2000  ±4899  (0-12000) | 166667  ±408248  (0-1000000) | 5167  ±12656  (0-31000) | 3667  ±8981  (0-22000) | 1.139 ns |
| **Total density of Rubiaceae** | **-** | **2000** | **166667** | **5167** | **3667** |
| **Total taxa: 36** | **15** | **14** | **17** | **11** | **16** | 1.113ns |

Mean ±SD; n=6, value in parenthesis indicate the range of the respective mean value ‘-’ represents absence of the taxa concerned;

For Kruskal-Wallis test, degree of freedom (n-1) = 4; **p<0.01; ns = non-significant; Total number of quadrats studied =300

**Table S2**. One-way analyses of variance for micro-topography, water flow regime and vegetation attributes in the wetland with flood phases as the main effect variable

| **Parameters** | | **F-ratio** |
| --- | --- | --- |
| Micro-topography | Depth (m) | 2.664ns |
| Width (m) | 0.857ns |
| Cross sectional area (m2) | 0.764ns |
| Water flow regime | Water velocity (m sec-1) | 2.685ns |
| Water discharge (Cubic m sec-1) | 2.544ns |
| Vegetation attributes | Species richness | 12.255** |
| Simpson dominance index | 2.210ns |
| Shannon-Wiener diversity index | 3.981* |
| Buzas and Gibson's evenness index | 2.759ns |
| Taxonomic distinctness | 0.095ns |
| Total C stock (Mg ha-1) | 3.544* |

Degree of freedom (n-1) = 2; **p<0.01; *p< 0.05; ns = non-significant

**Table S3**. Importance Value Index (IVI) of vegetation across various sampling stations of the wetland and Kruskal-Wallis test with habitat conditions under different sampling stations as the main effect variable

| **Taxa and family** | **Station 1**  **(Inlet**  **point 1)** | **Station 2**  **(Middle**  **point 1)** | **Station 3**  **(Inlet**  **point 2)** | **Station 4**  **(Middle**  **point 2)** | **Station 5**  **(Outlet**  **point)** | **Chi-square** |
| --- | --- | --- | --- | --- | --- | --- |
| **Amarathaceae** | | | | | | |
| *Alternanthera paronychioides* A. St.-Hil | - | - | 7.94±12.43  (0-26.76) | - | 15.23±23.89  (0-51.67) | 6.699ns |
| *Alternanthera sessilis* (L.) R. Br.ex DC | 10.05±11.18  (0-22.19) | - | 13.28±15.40  (0-35.46) | - | 6.20±15.20  (0-37.23) | 7.495ns |
| **Apiaceae** | | | | | | |
| *Centella asiatica* (L.) Urban | 5.08±12.45  (0-30.49) | 1.10±2.69  (0-6.58) | 6.47±12.84  (0-32.09) | 0.89±2.17  (0-5.31) | 1.39±3.40  (0-8.32) | 1.123ns |
| **Asteraceae** | | | | | | |
| *Centipeda minima* (L.) A.Braun & Asch. | - | - | - | - | 2.10±5.15  (0-12.63) | 4.000ns |
| *Eclipta prostrata* (L.) L. | - | - | 0.58±1.42  (0-3.49) | - | 1.93±4.72  (0-11.57) | 3.109ns |
| **Araceae** | | | | | | |
| *Colocasia esculenta* (L.) Schott | 14.05±21.79  (0-43.81) | - | - | - | - | 8.276ns |
| **Arecaceae** | | | | | | |
| *Calamus tenuis* Roxb. | - | - | - | 36.12±9.38  (13.94-40.10) | - | 28.538** |
| **Ceratophyllaceae** | | | | | | |
| *Ceratophyllum demersum* L. | - | 4.08±9.99  (0-24.47) | - | - | - | 4.000ns |
| **Convolvulaceae** | | | | | | |
| *Ipomoea* *carnea* Jacq. | 55.23±19.17  (34.32-89.64) | 16.33±11.35  (0-29.42) | 56.02±32.43  (0-85.74) | - | 43.20±25.16  (27.10-93.10) | 19.516** |
| **Cyperaceae** | | | | | | |
| *Cyperus halpan* L. | - | 2.23±5.46  (0-13.37) | - | - | - | 4.000ns |
| *Cyperus javanicus* Houtt. | - | 1.58±3.87  (0-9.47) | - | - | - | 4.000ns |
| *Cyperus compressus* L. | - | - | 2.02±4.96  (0-12.14) | - | 3.80±9.35  (0-22.91) | 3.109ns |
| *Eleocharis acicularis* (L.) Roem. & Schult. | - | - | - | 25.91±40.90  (0-90.09) | - | 8.276ns |
| *Fimbristylis bisumbellata*(Forssk.) Bubani | - | 59.69±22.94  (28.62-84.22) | - | 50.89±44.44  (0-100.85) | 6.47±15.85  (0-38.83) | 18.970** |
| *Fimbristylis littoralis* Gaudich | 3.58±8.77  (0-21.49) | - | - | - | - | 4.000ns |
| **Euphorbiaceae** | | | | | | |
| *Croton* *bonplandianus* Baill. | - | - | - | 6.78±16.60  (0-40.65) | - | 4.000ns |
| **Marantaceae** | | | | | | |
| *Schumannianthus dichotomus* (Roxb.) Gagnep. | - | 21.21±6.64  (20.11-36.54) | - | - | - | 28.538** |
| **Melastomataceae** | | | | | | |
| *Melastoma malabathricum* L. | - | 9.80±2.62  (10.10-21.06) | - | - | - | 28.538** |
| **Onagraceae** | | | | | | |
| *Ludwigia* *hyssopifolia* (G.Don) Exell | - | - | 2.36±5.79  (0-14.18) | - | - | 4.000ns |
| **Poaceae** | | | | | | |
| *Axonopus fissifolius* (Raddi) Kuhlm. | - | - | - | 7.45±13.66  (0-33.90) | - | 8.276ns |
| *Brachiaria ramosa* (L.) Stapf. | 8.90±13.81  (0-27.95) | - | 0.59±1.43  (0-3.51) | - | - | 5.963ns |
| *Chrysopogon aciculatus* (Retz.) Trin. | 11.24±24.98  (0-62.03) | - | 4.99±12.23  (0-29.97) | 5.29±10.50  (0-25.72) | - | 3.882ns |
| *Chrysopogon zizanioides* (L.) Roberty | 117.85±58.89  (57.74-191.55) | 70.68±14.32  (58.56-90.25) | 87.65±45  (36.19-154.59) | 92.93±21.26  (72.18-123.31) | 82.69±22.70  (56.96-116.70) | 3.247ns |
| *Cynodon dactylon* (L.) Pers. | 21.96±34.77  (0-77.22) | 52.24±59.46  (0-162.22) | 68.20±46.98  (0-134.88) | 64.68±57.25  (0-162.74) | 39.87±31.99  (0-75.62) | 3.665ns |
| *Digitaria ciliaris* (Retz.) Koeler | - | - | - | - | 3.82±9.30  (0-22.79) | 4.000ns |
| *Eleusine indica* (L.) Gaertn. | 3.04±7.44  (0-18.23) | - | - | - | - | 4.000ns |
| *Eragrostis unioloides* (Retz.) Nees ex Steud. | 7.24±14.79  (0-36.96) | - | - | - | - | 8.276ns |
| *Hemarthria compressa* (L.f.) R.Br. | - | - | 7.38±11.44  (0-22.43) | - | - | 8.276ns |
| *Paspalum notatum* Flüggé | 4.30±10.52  (0-25.77) | - | - | - | 3.49±8.54  (0-20.93) | 3.109ns |
| *Paspalum scrobiculatum* L. | - | 8.63±13.98  (0-32.33) | - | - | - | 8.276ns |
| *Pseudoraphis* *spinescens* (R.Br.) Vickery | - | 8.86±15.44  (0-37.78) | 3.90±9.55  (0-23.40) | - | - | 5.710ns |
| *Saccharum ravennae* (L.) L. | - | 42.39±12.02  (30.2-65.12) | 30±18.64  (12.25-63.01) | - | 71.02±20.01  (40.10-90.20) | 26.003** |
| *Sacciolepis* *interrupta* (Willd.) Stapf | 2.25±5.51  (0-13.49) | - | - | - | - | 4.000ns |
| **Polygonaceae** | | | | | | |
| *Persicaria hydropiper*  (L.) Delarbre | 26.95±22.86  (0-53.81) | - | 4.43±10.84  (0-26.56) | - | 4.98±12.21  (0-29.90) | 11.959* |
| **Pontederiaceae** | | | | | | |
| *Eichhornia crassipes* (Mart.) Solms | 8.28±9.18  (7.46-9.18) | - | 3.06±7.51  (0-18.39) | 5.61±13.73  (0-33.64) | 10.51±17.94  (0-43.45) | 4.108ns |
| **Rubiaceae** | | | | | | |
| *Oldenlandia diffusa* (Wild.) Roxb. | - | 1.20±2.94  (0-7.20) | 1.12±2.73  (0-6.69) | 3.45±6.01  (0-14.72) | 3.30±8.09  (0-19.83) | 1.139ns |

Mean ±SD; n=6, value in parenthesis indicate the range of the respective mean value; ‘-’ represents absence of the taxa concerned;

For Kruskal-Wallis test, degree of freedom (n-1) = 4; **p<0.01; ns = non-significant; Total number of quadrats studied =-300

**Table S4**. Carbon stock (Mg ha-1) of vegetation in different sampling stations of the wetland and Kruskal-Wallis test with habitat conditions under different sampling stations as the main effect variable

| **Taxa** | **Station 1**  **(Inlet**  **point 1)** | **Station 2**  **(Middle point 1)** | **Station 3**  **(Inlet**  **point 2)** | **Station 4**  **(Middle point 2)** | **Station 5**  **(Outlet point)** | **Chi-square** |
| --- | --- | --- | --- | --- | --- | --- |
| **Amarathaceae** |  | | | | | |
| *Alternanthera paronychioides* A. St.-Hil | - | - | 0.02±0.03  (0-0.08) | - | 0.29±0.7  (0-1.74) | 6.650ns |
| *Alternanthera sessilis* (L.) R. Br.ex DC | 0.04±0.09  (0-0.23) | - | 0.18±0.31  (0-0.8) | - | 0.02±0.05  (0-0.12) | 8.434 ns |
| **Apiaceae** |  | | | | | |
| *Centella asiatica* (L.) Urban | - | - | 0.01±0.01  (0-0.03) | - | 0.01±0.01  (0-0.02) | 1.139 ns |
| **Asteraceae** |  | | | | | |
| *Centipeda minima* (L.) A.Braun & Asch. | - | - | - | - | 0.001±0.002  (0-0.004) | 4.000 ns |
| *Eclipta prostrata* (L.) L. | - | - | 0.001±0.002  (0-0.004) | - | 0.001±0.002  (0-0.004) | 4.000 ns |
| **Arecaceae** |  | | | | | |
| *Calamus tenuis* Roxb. | - | - | - | 0.61±0.27  (0.34-1.13) | - | 28.538** |
| **Araceae** |  | | | | | |
| *Colocasia esculenta* (L.) Schott | 1.19±1.89  (0-4.16) | - | - | - | - | 8.276ns |
| **Ceratophyllaceae** |  | | | | | |
| *Ceratophyllum demersum* L. | - | 0.001±0.003  (0-0.006) | - | - | - | 4.000 ns |
| **Convolvulaceae** |  | | | | | |
| *Ipomoea* *carnea* Jacq. | 2.18±2.75  (0-7.32) | 0.71±0.3  (0.44-1.18) | 1.66±1.1  (0-3.12) | - | 0.55±0.37  (0-1.01) | 14.676** |
| **Cyperaceae** |  | | | | | |
| *Cyperus halpan* L. | - | - | 0±0.01  (0-0.02) | - | - | 3.109 ns |
| *Cyperus javanicus* Houtt. | - | 0±0.01  (0-0.03) | - | - | - | 4.000 ns |
| *Cyperus compressus* L. | - | - | - | - | 0±0.01  (0-0.02) | 4.000 ns |
| *Eleocharis acicularis* (L.) Roem. & Schult. | - | - | - | 0.05±0.09  (0-0.23) | - | 8.276 ns |
| *Fimbristylis bisumbellata*(Forssk.) Bubani | - | 0.59±0.52  (0.01-1.48) | - | 0.90±0.73  (0-1.93) | 0.04±0.1  (0-0.24) | 21.122** |
| *Fimbristylis littoralis* Gaudich | 0.01±0.03  (0-0.07) | - | - | - | - | 4.000ns |
| **Euphorbiaceae** |  | | | | | |
| *Croton eluteria* (L.) W. Wright | - | - | - | 0.08±0.13  (0-0.3) | - | 8.276ns |
| **Marantaceae** |  | | | | | |
| *Schumannianthus dichotomus* (Roxb.) Gagnep. | - | 0.38±0.23  (0.21-0.72) | - | - | - | 28.538** |
| **Melastomaceae** |  | | | | | |
| *Melastoma malabathricum* L. | - | 0.06±0.03  (0.03-0.11) | - | - | - | 28.538** |
| **Onagraceae** |  | | | | | |
| *Ludwigia* *hyssopifolia* (G.Don) Exell | - | - | 0.01±0.02  (0-0.04) | - | - | 4.000 ns |
| **Poaceae** |  | | | | | |
| *Axonopus fissifolius* (Raddi) Kuhlm. | - | - | - | 0.02±0.04  (0-0.11) | - | 8.276 ns |
| *Brachiaria ramosa (L.) Stapf.* | 0.01±0.03  (0-0.07) | - | - | - | - | 8.726 ns |
| *Chrysopogon aciculatus (*Retz.) Trin. | 0.05±0.13  (0-0.32) | - | 0.03±0.07  (0-0.19) | 0.01±0.04  (0-0.09) | - | 3.882 ns |
| *Chrysopogon zizanioides* (L.) Roberty | 1.55±2.39  (0-6) | 0.73±1.06  (0-2.73) | 1.32±0.96  (0.53-3.16) | 1.11±0.46  (0.46-1.6) | 1.66±1.74  (0.32-5.03) | 3.538 ns |
| *Cynodon dactylon* (L.) Pers. | 0.13±0.21  (0-0.45) | 0.13±0.12  (0-0.31) | 0.31±0.38  (0-1.02) | 0.31±0.36  (0-0.88) | 0.29±0.34  (0-0.91) | 2.080 ns |
| *Digitaria ciliaris* (Retz.) Koeler | - | - | - | - | 0.01±0.04  (0-0.11) | 4.000 ns |
| *Eleusine indica* (L.) Gaertn. | 0.04±0.11  (0-0.27) | - | - | - | - | 4.000 ns |
| *Eragrostis unioloides* (Retz.) Nees ex Steud. | 0.04±0.11  (0-0.27) | - | - | - | - | 4.000 ns |
| *Hemarthria compressa* (L.f.) R.Br. | - | - | 0.01±0.02  (0-0.05) | - | - | 8.276 ns |
| *Paspalum notatum* Flugge | 0.08±0.21  (0-0.53) | - | - | - | 0.02±0.05  (0-0.13) | 3.109 ns |
| *Paspalum scorbiculatum* L. | - | 0.04±0.07  (0-0.17) | - | - | - | 8.276 ns |
| *Pseudoraphis* *spinescens* (R.Br.) Vickery | - | 0.02±0.02  (0-0.05) | 0.004±0.01  (0-0.02) | - | - | 5.963 ns |
| *Saccharum ravennae* (L.) L. | - | 0.66±0.23  (0.42-0.96) | 1.38±0.71  (0.71-2.38) | - | 2.27±2.82  (0.43-6.34) | 23.775** |
| *Sacciolepis* *interrupta* (Willd.) Stapf | 0.004±0.009  (0-0.02) | - | - | - | - | 4.000 ns |
| **Polygonaceae** |  | | | | | |
| *Persicaria hydropiper* (L.) Delarbre | 0.28±0.17  (0-0.56) | - | 0.03±0.08  (0-0.21) | - | 0.05±0.12  (0-0.3) | 15.664** |
| **Pontederiaceae** |  | | | | | |
| *Eichhornia crassipes* (Mart.) Solms | 0.3±0.62  (0-1.57) | - | 0.007±0.02  (0-0.04) | 0.01±0.01  (0-0.03) | 0.05±0.1  (0-0.25) | 7.390 ns |
| **Rubiaceae** |  | | | | | |
| *Oldenlandia diffusa* (Wild.) Roxb. | - | - | - | 0.0004±0.001  (0-0.003) | 0.001±0.002  0-0.005 | 3.109 ns |

Mean ±SD; n=18, value in parenthesis indicate the range of the respective mean value; ‘-’ represents absence of the taxa concerned;

For Kruskal-Wallis test, degree of freedom (n-1) = 4; **p<0.01; ns = non-significant; Total number of quadrats sampled =90

**Table S5**. Detailed results of multiple regression analysis (using backward method) for carbon stock in wetland vegetation against the micro-topographic

parameters and water flow regime of the wetland

| **Coefficientsa** | | | | | | | | | |
| --- | --- | --- | --- | --- | --- | --- | --- | --- | --- |
| Model | Dependent variable | Predictor variable | Unstandardized Coefficients | | Standardized Coefficients | t | Sig. | 95.0% Confidence interval for B | |
| B | Std. Error | Beta | Lower Bound | Upper Bound |
| 1 | Carbon  stock  (Mg ha-1) | (Constant) | 2.147 | 1.207 |  | 1.778 | 0.088 | -0.345 | 4.639 |
| Depth (m) | 0.985 | 0.691 | 0.282 | 1.425 | 0.167 | -0.441 | 2.410 |
| Width (m) | 0.002 | 0.002 | 0.478 | 0.777 | 0.445 | -0.002 | 0.006 |
| Water velocity  (m sec-1) | 0.363 | 3.965 | 0.024 | 0.092 | 0.928 | -7.821 | 8.547 |
| Water discharge (Cubic m sec-1) | 0.475 | 0.292 | 0.436 | 1.625 | 0.117 | -0.128 | 1.079 |
| Cross-sectional area (m2) | -0.002 | 0.003 | -0.338 | -0.561 | 0.580 | -0.008 | 0.005 |
| 2 | Carbon  stock  (Mg ha-1) | (Constant) | 2.199 | 1.045 |  | 2.104 | 0.046 | 0.046 | 4.352 |
| Depth (m) | 0.964 | 0.641 | 0.276 | 1.503 | 0.145 | -0.357 | 2.285 |
| Width (m) | 0.001 | 0.002 | 0.473 | 0.788 | 0.438 | -0.002 | 0.005 |
| Water discharge (Cubic m sec-1) | 0.493 | 0.218 | 0.452 | 2.259 | 0.033 | .043 | 0.942 |
| Cross-sectional area (m2) | -0.002 | 0.003 | -0.339 | -0.574 | 0.571 | -0.008 | 0.005 |
| 3 | Carbon  stock  (Mg ha-1) | (Constant) | 2.218 | 1.031 |  | 2.151 | 0.041 | .098 | 4.337 |
| Depth (m) | 0.885 | 0.618 | 0.254 | 1.432 | 0.164 | -0.386 | 2.156 |
| Width (m) | 0.000 | 0.001 | 0.147 | 0.769 | 0.449 | -0.001 | 0.002 |
| Water discharge (Cubic m sec-1) | 0.502 | 0.215 | 0.461 | 2.339 | 0.027 | 0.061 | 0.944 |
| 4 | Carbon  stock  (Mg ha-1) | (Constant) | 2.720 | 0.792 |  | 3.433 | 0.002 | 1.094 | 4.345 |
| Depth (m) | 0.835 | 0.610 | 0.239 | 1.369 | 0.182 | -0.417 | 2.087 |
| Water discharge (Cubic m sec-1) | 0.428 | 0.190 | 0.393 | 2.249 | 0.033 | 0.037 | 0.819 |
| 5 | Carbon  stock  (Mg ha-1) | (Constant) | 3.334 | 0.663 |  | 5.026 | 0.000 | 1.975 | 4.692 |
| Water discharge (Cubic m sec-1) | 0.520 | 0.181 | 0.478 | 2.876 | 0.008 | 0.150 | 0.891 |

**Table S6**. Excluded variables in the multiple regression analysis (using backward method) for carbon stock in wetland vegetation against the micro-topographic

and water flow regime of the wetland

| **Excluded variablesa** | | | | | | | | |
| --- | --- | --- | --- | --- | --- | --- | --- | --- |
| Model | Dependent variable | Predictor variables | Beta In | t | Sig. | | Partial Correlation | Collinearity Statistics |
| Tolerance |
| 1 | Carbon  stock  (Mg ha-1) | Water velocity  (m sec-1) | .024b | .092 | .928 | | .019 | .426 |
| 2 | Carbon  stock  (Mg ha-1) | Water velocity  (m sec-1) | .026c | .101 | .920 | | .020 | .426 |
| Cross-sectional area (m2) | -.339c | -.574 | .571 | | -.114 | .080 |
| 3 | Carbon  stock  (Mg ha-1) | Water velocity  (m sec-1) | -.032d | -.131 | .897 | | -.026 | .468 |
| Cross-sectional area (m2) | .102d | .538 | .595 | | .105 | .768 |
| Width (m) | .147d | .769 | .449 | | .149 | .744 |
| 4 | Carbon  stock  (Mg ha-1) | Water velocity  (m sec-1) | -.120e | -.510 | .614 | | -.098 | .511 |
| Cross-sectional area (m2) | .094e | .491 | .627 | | .094 | .769 |
| Width (m) | .118e | .611 | .547 | | .117 | .752 |
| Depth (m) | .239e | 1.369 | .182 | | .255 | .875 |
| a. Dependent Variable: Total carbon stock | | | | | |  | | |
| b. Predictors in the Model: (Constant), Cross sectional area, depth, water discharge, Width | | | | | |  | | |
| c. Predictors in the Model: (Constant), depth, water discharge, Width | | | | | |  | | |
| d. Predictors in the Model: (Constant), depth, water discharge | | | | | |  | | |
| e. Predictors in the Model: (Constant), water discharge | | | | | |  | | |
